# Supplementary material
Source: PubMed Central journal article supplement (PMC6258928)
Supplement: ba024802-suppl1.pdf [file ba024802-suppl1.pdf]

American Society of Hematology Guidelines for Management of Venous Thromboembolism:  
VTE in the Context of Pregnancy

**Supplement 1: Panel and Systematic Review Team Membership**

**Table:** Panel Members

| <b>ASH Guideline Panel on VTE in the Context of Pregnancy</b> |                   |                                                     |
|---------------------------------------------------------------|-------------------|-----------------------------------------------------|
| 1                                                             | Shannon Bates     | Chair, Hematologist                                 |
| 2                                                             | Bram Rochweg      | Vice-chair, Methodologist                           |
| 3                                                             | Anita Rajasekhar  | Hematologist                                        |
| 4                                                             | Saskia Middeldorp | Internist                                           |
| 5                                                             | Claire McLintock  | Hematologist, Specialist in Maternal Fetal Medicine |
| 6                                                             | Marc A. Rodger    | Hematologist                                        |
| 7                                                             | Andra H. James    | Obstetrician                                        |
| 8                                                             | Sara R. Vazquez   | Pharmacist                                          |
| 9                                                             | Ian A. Greer      | Obstetrician                                        |
| 10                                                            | Danielle Barrett  | Patient Representative                              |
| 11                                                            | Andrea LaHaye     | Patient Representative                              |

**Table:** McMaster GRADE Centre Researchers Contributing to Evidence Syntheses

| <b>McMaster GRADE Centre Researchers</b> |                           |
|------------------------------------------|---------------------------|
| 1                                        | John Riva                 |
| 2                                        | Meha Bhatt                |
| 3                                        | Nicole Schwab             |
| 4                                        | Arnav Agarwal             |
| 5                                        | Elie Akl                  |
| 6                                        | Tejan Baldeh              |
| 7                                        | Sara Balduzzi             |
| 8                                        | Angela Barbara            |
| 9                                        | Housne Begum              |
| 10                                       | Cody Braun                |
| 11                                       | Rana Charide              |
| 12                                       | Rachel Couban - librarian |
| 13                                       | Carlos Cuello             |
| 14                                       | Andrea Darzi              |
| 15                                       | Chengyi Ding              |
| 16                                       | Itziar Etxeandia          |
| 17                                       | Ivan Florez               |
| 18                                       | Naghmeh Foroutan          |
| 19                                       | Laura Fullerton           |
| 20                                       | Himmat Grewal             |

American Society of Hematology Guidelines for Management of Venous Thromboembolism:  
VTE in the Context of Pregnancy

|    |                        |
|----|------------------------|
| 21 | Mira Hammoud           |
| 22 | Ariel Izcovich         |
| 23 | Samer Karam            |
| 24 | Rasha Khatib           |
| 25 | Tamara Lotfi           |
| 26 | Carolina Mendoza       |
| 27 | Rebecca Morgan         |
| 28 | Gian Paolo Morgano     |
| 29 | Rami Morsi             |
| 30 | Ignacio Neumann        |
| 31 | Robby Nieuwlaat        |
| 32 | Ignacio Pineda         |
| 33 | Yasir Rehman           |
| 34 | Francisca Rodriguez    |
| 35 | Yetiani Roldan Benitez |
| 36 | Stephanie Ross         |
| 37 | Chen Ru                |
| 38 | Holger Schünemann      |
| 39 | Ibrahim Tsolakian      |
| 40 | Matt Ventresca         |
| 41 | Li Wang - statistician |
| 42 | Reem Waziry            |
| 43 | Wojtek Wiercioch       |
| 44 | Juan José Yepes-Nuñez  |
| 45 | Yuan Zhang             |
| 46 | Yuqing Zhang           |
